# Supplementary material for: Humic Substances as Indicator of Degradation Rate of Chernozems in South-Eastern Poland
Source: MDPI journal article supplement (doi:10.3390/agronomy12030733), 2022-03-17
Supplement: s1 [file s1]

**Table S1.** Physicochemical properties of complete chernozemic profiles under study

| Horizon          | Depth<br>cm | Color<br>moist | pH<br>H <sub>2</sub> O | CaCO <sub>3</sub><br>% | SOC<br>% | N<br>% | Ha<br>cmol <sup>+</sup> ·kg <sup>-1</sup> | BC<br>% | BS<br>% | Sand<br>% | Silt<br>% | Clay<br>% | Texture |
|------------------|-------------|----------------|------------------------|------------------------|----------|--------|-------------------------------------------|---------|---------|-----------|-----------|-----------|---------|
| <b>Profile 1</b> |             |                |                        |                        |          |        |                                           |         |         |           |           |           |         |
| Ap               | 0-25        | 10YR 3/1       | 7.60                   | 0.42                   | 1.94     | 0.16   | 0.35                                      | 21.7    | 98.4    | 11        | 72        | 17        | SiL     |
| A2               | 25-40       | 10YR 2/1       | 7.88                   | 0.21                   | 1.64     | 0.12   | 0.43                                      | 18.9    | 97.8    | 9         | 75        | 16        | SiL     |
| A3               | 40-75       | 10YR 2/1       | 7.96                   | 0.30                   | 1.99     | 0.12   | 0.32                                      | 22.5    | 98.6    | 9         | 69        | 22        | SiL     |
| AC               | 75-95       | 10YR 4/3       | 8.02                   | 0.26                   | 1.08     | 0.07   | 0.23                                      | 17.8    | 98.7    | 8         | 70        | 22        | SiL     |
| C                | 95-120      | 10YR 5/6       | 8.24                   | 0.30                   | 0.24     | -      | 0.01                                      | 11.7    | 100     | 10        | 73        | 17        | SiL     |
| Ck               | 120+        | 10YR 7/6       | 8.57                   | 12.08                  | 0.28     | -      | 0                                         | 95.2    | 100     | 11        | 72        | 17        | SiL     |
| <b>Profile 2</b> |             |                |                        |                        |          |        |                                           |         |         |           |           |           |         |
| Apk              | 0-35        | 10YR 2/2       | 8.10                   | 6.36                   | 1.44     | 0.13   | 0                                         | 85.0    | 100     | 14        | 71        | 15        | SiL     |
| ACk              | 35-55       | 10YR 4/3       | 8.44                   | 18.90                  | 0.67     | 0.05   | 0                                         | 93.5    | 100     | 15        | 65        | 20        | SiL     |
| Ck1              | 55-70       | 10YR 6/4       | 8.55                   | 24.20                  | 0.42     | -      | 0                                         | 93.0    | 100     | 20        | 61        | 19        | SiL     |
| <b>Profile 3</b> |             |                |                        |                        |          |        |                                           |         |         |           |           |           |         |
| Ap               | 0-30        | 10YR 4/2       | 8.18                   | 16.70                  | 1.03     | 0.07   | 0                                         | 91.6    | 100     | 18        | 65        | 17        | SiL     |
| Bwtk             | 30-42       | 10YR 5/4       | 8.48                   | 19.10                  | 0.41     | -      | 0                                         | 91.2    | 100     | 23        | 57        | 20        | SiL     |
| BCK              | 42-80       | 10YR 6/4       | 8.49                   | 26.70                  | 0.17     | -      | 0                                         | 90.2    | 100     | 19        | 65        | 16        | SiL     |
| <b>Profile 4</b> |             |                |                        |                        |          |        |                                           |         |         |           |           |           |         |
| Ap               | 0-25        | 10YR 3/2       | 8.10                   | 8.48                   | 1.48     | 0.14   | 0.03                                      | 94.3    | 100     | 18        | 64        | 18        | SiL     |
| A2               | 25-48       | 10YR 3/2       | 8.05                   | 9.54                   | 1.31     | 0.14   | 0.01                                      | 93.0    | 100     | 18        | 65        | 17        | SiL     |
| A3               | 48-54       | 10YR 3/2       | 8.23                   | 5.09                   | 1.52     | 0.12   | 0.02                                      | 90.7    | 100     | 14        | 63        | 23        | SiL     |
| ABk1             | 54-78       | 10YR 2/1       | 8.27                   | 1.69                   | 2.24     | 0.16   | 0.06                                      | 57.3    | 100     | 13        | 57        | 30        | SiCL    |
| ABk2             | 78-115      | 10YR 2/1       | 8.20                   | 1.06                   | 2.23     | 0.14   | 0                                         | 42.7    | 100     | 12        | 56        | 32        | SiCL    |
| ACk              | 115-130     | 10YR 4/2       | 8.34                   | 19.30                  | 1.47     | 0.03   | 0                                         | 107     | 100     | 14        | 50        | 36        | SiCL    |
| Ck               | 130-150     | 10YR 7/4       | 8.58                   | 35.40                  | 0.77     | -      | 0                                         | 100     | 100     | 18        | 54        | 28        | SiCL    |
| <b>Profile 5</b> |             |                |                        |                        |          |        |                                           |         |         |           |           |           |         |
| A1               | 0-35        | 10YR 3/2       | 4.55                   | 0.59                   | 1.82     | 0.15   | 5.10                                      | 5.3     | 51.1    | 10        | 78        | 12        | SiL     |
| A2               | 35-65       | 10YR 3/1       | 5.14                   | 0.51                   | 0.83     | 0.06   | 4.31                                      | 8.5     | 66.2    | 9         | 68        | 23        | SiL     |

|                  |         |          |      |       |      |      |      |      |      |    |    |    |     |
|------------------|---------|----------|------|-------|------|------|------|------|------|----|----|----|-----|
| A/Bw1            | 65-90   | 10YR 4/4 | 5.33 | 0.33  | 0.46 | 0.04 | 2.47 | 9.6  | 79.6 | 9  | 67 | 24 | SiL |
| A/Bw2            | 90-120  | 10YR 5/4 | 6.80 | 0.68  | 0.46 | 0.02 | 0.00 | 16.9 | 100  | 9  | 71 | 20 | SiL |
| Ckcg             | 120-170 | 10YR 6/3 | 7.94 | 9.13  | -    | -    | 0.00 | 87.9 | 100  | 11 | 75 | 14 | SiL |
| <b>Profile 6</b> |         |          |      |       |      |      |      |      |      |    |    |    |     |
| Ap               | 0-31    | 10YR 2/1 | 7.16 | 3.13  | 3.29 | 0.30 | 0.65 | 31.4 | 98.0 | 13 | 73 | 14 | SiL |
| ABwg             | 31-55   | 10YR 3/2 | 7.86 | 12.34 | 1.15 | 0.11 | 0    | 52.2 | 100  | 12 | 71 | 17 | SiL |
| BCK1             | 55-75   | 10YR 4/2 | 8.18 | 0.33  | 0.61 | 0.05 | 0    | 86.7 | 100  | 11 | 69 | 20 | SiL |
| BCK2             | 75-105  | 10YR 5/3 | 8.42 | 13.18 | 0.39 | 0.05 | 0    | 82.1 | 100  | 10 | 70 | 20 | SiL |
| Ckcg             | 105-130 | 10YR 6/3 | 8.61 | 10.31 | 0.21 | 0.03 | 0    | 88.1 | 100  | 9  | 72 | 19 | SiL |
| <b>Profile 7</b> |         |          |      |       |      |      |      |      |      |    |    |    |     |
| Ap1              | 0-20    | 10YR 2/2 | 7.13 | 0.05  | 1.44 | 0.11 | 0.61 | 12.4 | 95.3 | 36 | 51 | 13 | SiL |
| Ap2              | 20-40   | 10YR 1/1 | 7.08 | 0.08  | 1.49 | 0.12 | 0.81 | 12.9 | 94.1 | 34 | 55 | 11 | SiL |
| Ahk              | 40-65   | 10YR 3/2 | 7.18 | 1.08  | 1.04 | 0.07 | 0.64 | 12.5 | 95.1 | 29 | 55 | 16 | SiL |
| A/Ck             | 65-90   | 10YR 4/2 | 7.81 | 2.70  | 0.78 | 0.06 | 0    | 67.9 | 100  | 30 | 54 | 16 | SiL |
| Ckc              | 95-110  | 10YR 6/3 | 8.13 | 9.04  | 0.15 | -    | 0    | 80.8 | 100  | 39 | 49 | 12 | SiL |
| Ckcg1            | 110-125 | 2.5Y 6/3 | 8.22 | 8.45  | 0.16 | -    | 0    | 78.1 | 100  | 29 | 59 | 12 | SiL |
| <b>Profile 8</b> |         |          |      |       |      |      |      |      |      |    |    |    |     |
| Ap               | 0-45    | 10YR 1/1 | 7.97 | 0.25  | 2.75 | 0.18 | 0    | 27.2 | 100  | 12 | 78 | 10 | SiL |
| A                | 45-65   | 10YR 2/1 | 8.06 | 0.17  | 1.57 | 0.11 | 0    | 18.6 | 100  | 10 | 70 | 20 | SiL |
| A/Cgg            | 65-75   | 5Y 7/2   | 8.01 | 3.45  | 0.65 | 0.07 | 0    | 41.3 | 100  | 10 | 69 | 21 | SiL |
| Gk               | 75-85   | 5Y 7/2   | 8.06 | 10.4  | 0.44 | 0.05 | 0    | 80.4 | 100  | 12 | 71 | 17 | SiL |
| Ckcg             | 85-150  | 10YR 6/8 | 8.10 | 7.27  | 0.22 | 0.02 | 0    | 77.0 | 100  | 10 | 72 | 18 | SiL |

Explanation: SOC – soil organic carbon; N – total nitrogen; Ha – total extractable acidity (“hydrolitic acidity”); BC – base saturation; BS – base saturation: SiL – silty loam, SiCL – silty clay loam,

**Table S2.** Composition of humic substances extracted by Tyurin and IHSS method.

| Tyurin method |                |             |      |      |              |      |      |             |      |      |           |                |           | IHSS method    |      |      |      |              |        |
|---------------|----------------|-------------|------|------|--------------|------|------|-------------|------|------|-----------|----------------|-----------|----------------|------|------|------|--------------|--------|
| Profile       | Fractio<br>n I | Fraction II |      |      | Fraction III |      |      | Fraction IV |      |      | HA-<br>Ca | Fractio<br>n V | HA/<br>FA | Fractio<br>n A |      |      |      | Residu<br>um | HA/ FA |
|               |                | CT          | HA   | FA   | CT           | HA   | FA   | CT          | HA   | FA   |           |                |           |                | CT   | HA   | FA   |              |        |
| Profile 1     |                |             |      |      |              |      |      |             |      |      |           |                |           |                |      |      |      |              |        |
| Ap            | 2.58           | 13.4        | 11.9 | 1.55 | 33.5         | 20.6 | 12.9 | 23.7        | 12.9 | 10.8 | 8.7       | 40.2           | 1.4       | 2.19           | 36.6 | 23.9 | 12.6 | 61.2         | 1.9    |
| A2            | 1.83           | 10.9        | 10.4 | 0.61 | 36.6         | 26.8 | 9.76 | 22.6        | 14.0 | 8.5  | 16.5      | 39.0           | 1.9       | 2.43           | 37.1 | 24.6 | 12.6 | 60.4         | 2.0    |
| A3            | 1.76           | 9.04        | 6.53 | 2.51 | 37.7         | 26.6 | 11.1 | 29.1        | 16.1 | 13.1 | 20.1      | 31.4           | 1.6       | 1.32           | 53.8 | 35.2 | 18.6 | 44.9         | 1.9    |
| Profile 2     |                |             |      |      |              |      |      |             |      |      |           |                |           |                |      |      |      |              |        |
| Apk           | 3.82           | 15.9        | 14.6 | 1.39 | 26.4         | 18.1 | 8.33 | 22.9        | 9.72 | 13.2 | 3.47      | 46.9           | 1.2       | 3.43           | 43.9 | 25.9 | 18.0 | 52.7         | 1.4    |
| Profile 3     |                |             |      |      |              |      |      |             |      |      |           |                |           |                |      |      |      |              |        |
| Ap            | 3.90           | 18.5        | 10.7 | 7.79 | 27.2         | 11.6 | 15.6 | 25.2        | 10.7 | 14.6 | 0.86      | 43.6           | 0.7       | 3.44           | 37.9 | 14.6 | 23.3 | 58.7         | 0.6    |
| Profile 4     |                |             |      |      |              |      |      |             |      |      |           |                |           |                |      |      |      |              |        |
| Ap            | 4.40           | 12.9        | 12.2 | 0.68 | 39.2         | 24.3 | 14.9 | 20.9        | 8.11 | 12.8 | 12.1      | 39.9           | 1.0       | 4.10           | 42.8 | 23.8 | 19.1 | 53.1         | 1.3    |
| A2            | 4.31           | 19.1        | 16.8 | 2.29 | 41.2         | 25.9 | 15.3 | 25.2        | 12.2 | 12.9 | 9.17      | 33.2           | 1.2       | 4.10           | 38.8 | 20.6 | 18.2 | 57.1         | 1.1    |
| A3            | 4.86           | 13.1        | 11.2 | 1.97 | 44.1         | 32.2 | 11.8 | 20.4        | 9.21 | 11.2 | 21.1      | 35.1           | 1.5       | 3.70           | 41.5 | 22.3 | 18.1 | 54.9         | 1.3    |
| Profile 5     |                |             |      |      |              |      |      |             |      |      |           |                |           |                |      |      |      |              |        |
| A1            | 3.02           | 44.5        | 21.4 | 23.1 | 47.3         | 23.6 | 23.7 | 19.2        | 6.04 | 13.2 | 2.20      | 30.5           | 0.7       | 3.32           | 45.5 | 18.3 | 27.2 | 51.2         | 0.7    |
| A2            | 3.01           | 37.2        | 19.2 | 17.9 | 48.2         | 19.3 | 28.9 | 27.7        | 10.8 | 16.9 | 0.09      | 21.1           | 0.6       | 4.50           | 42.0 | 15.5 | 26.6 | 53.5         | 0.6    |
| Profile 6     |                |             |      |      |              |      |      |             |      |      |           |                |           |                |      |      |      |              |        |
| Ap            | 2.30           | 14.9        | 12.1 | 2.73 | 38.6         | 29.2 | 9.42 | 20.4        | 10.9 | 9.42 | 17.0      | 38.8           | 1.9       | 1.81           | 39.3 | 27.8 | 11.5 | 58.9         | 2.4    |
| Profile 7     |                |             |      |      |              |      |      |             |      |      |           |                |           |                |      |      |      |              |        |
| Ap1           | 3.10           | 22.3        | 16.0 | 6.26 | 43.8         | 26.4 | 17.4 | 27.8        | 12.5 | 15.3 | 10.4      | 25.4           | 1.1       | 2.55           | 52.0 | 31.9 | 20.1 | 45.5         | 1.6    |
| Ap2           | 2.70           | 23.5        | 16.1 | 7.39 | 51.7         | 30.9 | 20.8 | 24.2        | 8.72 | 15.4 | 14.8      | 21.4           | 1.1       | 2.63           | 47.1 | 31.0 | 16.0 | 50.3         | 1.9    |
| Ahk           | 2.91           | 35.5        | 18.2 | 17.3 | 54.9         | 39.4 | 15.4 | 25.9        | 18.3 | 7.7  | 21.2      | 16.3           | 2.1       | 3.20           | 64.6 | 50.0 | 14.6 | 32.2         | 3.4    |
| Profile 8     |                |             |      |      |              |      |      |             |      |      |           |                |           |                |      |      |      |              |        |
| Ap            | 1.82           | 10.6        | 8.73 | 1.82 | 37.1         | 28.7 | 8.36 | 26.9        | 20.4 | 6.55 | 20.0      | 34.2           | 2.8       | 1.52           | 50.7 | 37.1 | 13.6 | 47.8         | 2.7    |
| A             | 1.91           | 12.1        | 11.5 | 0.64 | 42.7         | 34.4 | 8.28 | 31.9        | 19.1 | 12.7 | 22.9      | 23.6           | 2.1       | 1.88           | 51.1 | 34.9 | 16.2 | 47.0         | 2.2    |
